# Supplementary material for: Synthesis and properties of a novel fluorescent organogel: AIE, GO hybrid functional gel, and multi-stimuli responsiveness
Source: Royal Society of Chemistry journal article supplement (doi:10.1039/d4nj04671d), 2025-01-01
Supplement: d4nj04671d1.pdf [file d4nj04671d1.pdf]

## Supporting Information

### **Synthesis and properties of novel fluorescent organogel: AIE, GO hybrid functional gel, and multi-stimuli responsiveness**

Miao Luo,<sup>a</sup> Chengpeng Li,<sup>a</sup> Qing Yan,<sup>a</sup> and Sheng Wang<sup>\*a,b</sup>

---

<sup>a</sup> School of Chemistry and Chemical Engineering, Key Laboratory of Clean Energy Materials Chemistry of Guangdong Higher Education Institutes, Lingnan Normal University, Zhanjiang, 524048, China. E-mail: [dyesws@126.com](mailto:dyesws@126.com)

<sup>b</sup> School of Chemistry and Materials Engineering, Huizhou University, Huizhou, 516007, China.

# Contents

|                                                                                                                                                                                                                                                                                                                                                                                             |    |
|---------------------------------------------------------------------------------------------------------------------------------------------------------------------------------------------------------------------------------------------------------------------------------------------------------------------------------------------------------------------------------------------|----|
| <b>Synthesis and characterization</b> .....                                                                                                                                                                                                                                                                                                                                                 | 4  |
| <b>2.1 Materials and instruments</b> .....                                                                                                                                                                                                                                                                                                                                                  | 4  |
| <b>2.2 Synthesis of 3-Cholesteryloxycarbonylpropanoic acid (1):</b> .....                                                                                                                                                                                                                                                                                                                   | 6  |
| <b>2.3 Synthesis of P5-CHO</b> .....                                                                                                                                                                                                                                                                                                                                                        | 6  |
| <b>Figure S1</b> SEM images of <b>P5-CHO</b> prepared from different water fractions in THF/water mixtures. ....                                                                                                                                                                                                                                                                            | 9  |
| <b>Figure S2</b> PL spectra of <b>P5-CHO</b> in $f_{\text{water}}=90\%$ (v/v, THF/water mixture) and polyethylene glycol (PEG) with different temperature ( $\lambda_{\text{ex}} = 365 \text{ nm}$ ), the concentration of <b>P5-CHO</b> is $2.5 \times 10^{-5} \text{ mol/L}$ , the concentration of PEG is $0.1 \text{ g/mL}$ .....                                                       | 10 |
| <b>Figure S3</b> PL spectra of <b>P5-CHO</b> in solid powder.....                                                                                                                                                                                                                                                                                                                           | 11 |
| <b>Figure S4</b> SEM image of xerogel prepared from different solutions for <b>P5-CHO</b> , (a) cyclohexane, (b) acetone, (c) DMF, (d) DMSO. ....                                                                                                                                                                                                                                           | 12 |
| <b>Figure S5</b> $^1\text{H}$ NMR of <b>P5-CHO</b> in different conditions, solvent: DMSO- $d_6$ , (a) gel of P5-CHO: add 0.55mL deuterated DMSO to 10 mg <b>P5-CHO</b> , heat to dissolve, and then stand to obtain gel, (b) add 3 drops of 1mol/L tetrabutylammonium fluoride solution to (a) to obtain solution, (c) then add 2 drops of $\text{HClO}_4$ to solution(b) to form gel..... | 13 |
| <b>Figure S6</b> Time-resolved emission decay curves of native gel and GO-hybrid gel of <b>P5-CHO</b> . ....                                                                                                                                                                                                                                                                                | 14 |
| <b>Figure S7</b> UV-vis absorption spectra of hybrid gel system in different states, (A) gel in DMSO, (B) GO-hybrid gel in DMSO, (C) GO dissolved in DMSO, (D) gel in DMF, (E) GO-hybrid gel in DMF, (F) GO dissolved in DMF.....                                                                                                                                                           | 15 |
| <b>Figure S8</b> SEM image of xerogel prepared from different solutions for <b>P5-CHO</b> , (A) gel in DMSO, (B) GO-hybrid gel in DMSO, (C) GO dissolved in DMSO, (D) gel in DMF, (E) GO-hybrid gel in DMF, (F) GO dissolved in DMF.....                                                                                                                                                    | 16 |
| <b>Figure S9</b> FTIR spectrum of xerogel prepared from different solutions for <b>P5-CHO</b> , (A) gel in DMSO, (B) GO-hybrid gel in DMSO, (C) GO dissolved in DMSO, (D) gel in DMF, (E) GO-hybrid gel in DMF, (F) GO dissolved in DMF.....                                                                                                                                                | 17 |
| <b>Figure S10</b> XRD spectrum of xerogel prepared from different solutions for <b>P5-CHO</b> , (A) gel in DMSO, (B) GO-hybrid gel in DMSO, (D) gel in DMF, (E) GO-hybrid gel in DMF.....                                                                                                                                                                                                   | 18 |
| <b>Figure S11</b> WAXD curves (A) and normalized PL curves (B) of compound <b>P5-CHO</b> under the different conditions: origin, fumed (vapor the pressed sample in $\text{CH}_2\text{Cl}_2$ for 5 min), pressing and annealing (heating the pressed sample at $164 \text{ }^\circ\text{C}$ for 5 min). ....                                                                                | 19 |

|                                                                                                                           |    |
|---------------------------------------------------------------------------------------------------------------------------|----|
| <b>Figure S12</b> Time-resolved emission decay curves of compound <b>P5-CHO</b> under different treatment conditions..... | 20 |
| <b>Table S1</b> the relation of the CGC and the GO concentration in DMF and DMSO. ....                                    | 21 |
| <b>Table S2</b> Solid-state fluorescence lifetime data of <b>P5-CHO</b> under different conditions. ....                  | 22 |
| <b>Table S3</b> the photoluminescence quantum yield (PLQY) data of <b>P5-CHO</b> under different conditions.....          | 23 |
| <b>References</b> .....                                                                                                   | 24 |

## Synthesis and characterization

### 2.1 Materials and instruments

4-Aminophenylboronic acid, 4-bromophenyl phenylmethanone, diphenylmethane, cholesterol, succinic anhydride, 2,4-dihydroxybenzaldehyde, n-butyl lithium, aliquat 336, tetrakis (triphenylphosphine) palladium (0) were purchased from Aladdin company and used as received. 4-dimethylaminoipyridine (DMAP), 4-toluene sulfonic acid, 1-(3-dimethylaminopropyl)-3-ethylcarbodiimide hydrochloride (EDC-HCl) were purchased from Shanghai Darui company (China) used as received. Ultra-pure water was used in the experiments. Tetrahydrofuran (THF) was distilled from sodium/benzophenone. All other reagents and solvents were purchased as analytical grade from Zhangjiang Kangbai Company (China) and used without further purification. 1-bromo-4-(1,2,2-triphenylvinyl)benzene (TPE-Br)<sup>1</sup>, and 4'-(1,2,2-triphenylvinyl)biphenyl-4-amine (P<sub>5</sub>NH<sub>2</sub>)<sup>1-2</sup> were prepared according to the literature methods.

The IR spectra were measured on a Nicolet-6700 FT-IR spectrometer by incorporating the samples in KBr disks. Proton and carbon nuclear magnetic resonance (<sup>1</sup>H NMR and <sup>13</sup>C NMR) spectra were measured on a Bruker AVANCE III spectrometer [CDCl<sub>3</sub>, tetramethylsilane (TMS) as the internal standard]. The electronic spray ionization (ESI) high-resolution mass spectra were tested on a HP 5958 mass spectrometer. The SEM images were obtained using a Hitachi S-4800 spectrometer. The UV/Vis spectra were determined on a Shimadzu-2550 spectrophotometer. Wide-angle X-ray diffraction (WAXD) measurement was performed by using a Philips X'Pert Pro diffractometer with an X-ray source of Cu Ka ( $\lambda=0.15406$  nm) at 40 kV and 40 mA, at scan rates of 4 °per 1 min. Differential scanning calorimetry (DSC) curves were obtained with a NETZSCH thermal analyzer at a heating rate of 10 °C/min under N<sub>2</sub> atmosphere. Photoluminescence spectra (PL) were measured on a Cary Eclipse spectrometer with 5 nm and 5 nm slit widths for excitation and emission, respectively. The THF/water mixtures with different water fractions were prepared by slowly adding

distilled water into the THF solution of samples under ultrasound at room temperature. Pressed samples were prepared by pressing in an IR pellet at 1500 psi for 5 min. Annealing experiments were done on a hot-stage with automatic temperature control system for 5 min, the annealing temperatures was 164 °C. The experiment of solvent vapor fuming treatment was performed by filling the pressed sample on a grooved glass slide, which was then placed in a large beaker saturated with CH<sub>2</sub>Cl<sub>2</sub> vapor for 5 min at room temperature.

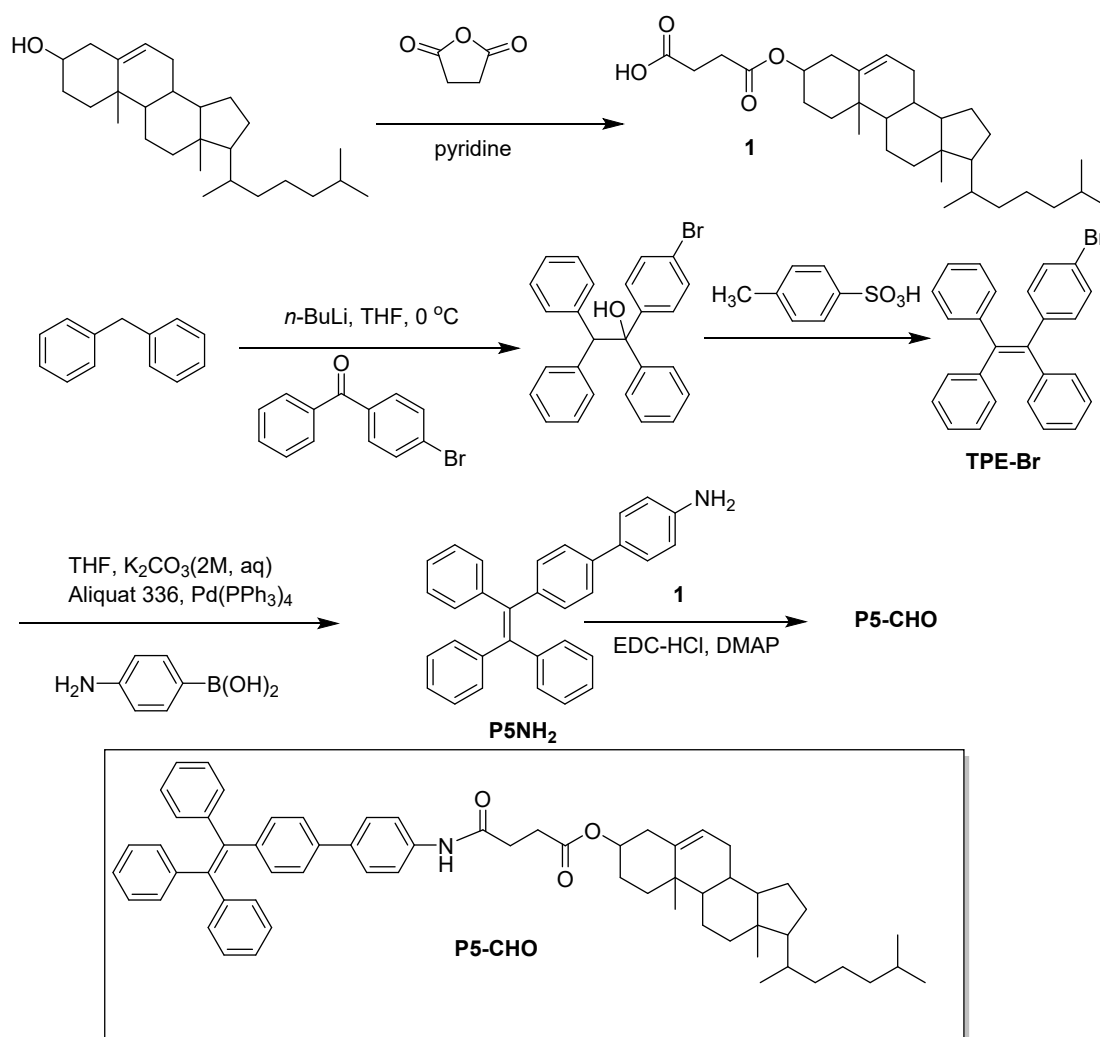

**Scheme S1.** Synthetic routes for **P5-CHO**

## 2.2 Synthesis of 3-Cholesteryloxycarbonylpropanoic acid (1):

A solution of cholesterol (5.80 g, 15 mmol), succinic anhydride (1.50 g, 15 mmol), pyridine (1.00 mL), and dry heptane (150 mL) were heated to reflux for 21 h and cooled to room temperature. The resulting precipitate was recrystallized twice from acetone. Yield: 70%.

## 2.3 Synthesis of P5-CHO

**P<sub>5</sub>NH<sub>2</sub>** (0.20 g, 0.47 mmol) and **1** (0.26 g, 0.54 mmol) were dissolved in THF (50 mL), and then EDC-HCl (0.01 g) and DMAP (0.01 g) were added. The solution was stirred at room temperature for 12 hours. After removing the solvent under reduced pressure, the residue was crystallized from ethanol to give white crystalline powder **P5-CHO** (0.31 g, 73.8% yield). IR (KBr):  $\nu=3434\text{ cm}^{-1}$  (N-H),  $2942\text{ cm}^{-1}$  (-CH<sub>2</sub>-),  $2867\text{ cm}^{-1}$  (-CH<sub>3</sub>),  $1731\text{ cm}^{-1}$  (C=O at COOR),  $1699\text{ cm}^{-1}$  (C=O at RCONHR'),  $1671\text{ cm}^{-1}$  (C=C), 1598, 1528,  $1497\text{ cm}^{-1}$  (phenyl); <sup>1</sup>H NMR (400 MHz, CDCl<sub>3</sub>)  $\delta$  7.72 (s, 1H), 7.54 (q, J = 8.8 Hz, 4H), 7.34 (d, J = 8.3 Hz, 2H), 7.17 – 7.03 (m, 16H), 5.39 (d, J = 3.8 Hz, 1H), 4.74 – 4.60 (m, 1H), 2.73 (dt, J = 12.1, 5.8 Hz, 4H), 2.35 (d, J = 7.8 Hz, 2H), 2.01 (t, J = 15.5 Hz, 2H), 1.88 (d, J = 11.1 Hz, 3H), 1.55 – 0.84 (m, 33H), 0.70 (s, 3H); <sup>13</sup>C-NMR (CDCl<sub>3</sub>, 75MHz)  $\delta$  (ppm): 172.5, 169.8, 143.9, 142.4, 141.0, 140.3, 139.1, 138.2, 137.3, 136.6, 131.9, 131.4, 126.7, 126.3, 122.9, 120.3, 74.2, 56.6, 55.6, 50.0, 39.9, 39.7, 37.8, 36.8, 36.6, 35.9, 32.4, 27.9, 24.1, 23.7, 22.9, 19.4, 19.0, 12.1; MALDI-TOF MS (ES<sup>+</sup>): m/z 892.5665 ([M+H]<sup>+</sup>, calcd for C<sub>63</sub>H<sub>73</sub>NO<sub>3</sub>, 891.5590).

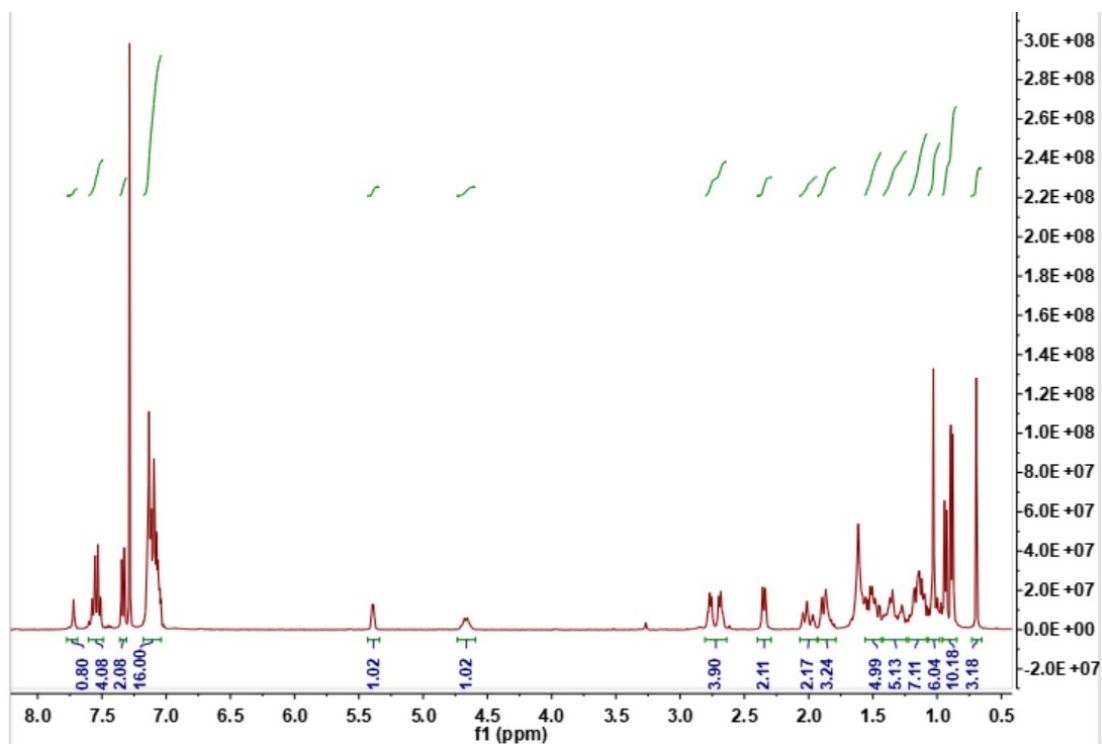

<sup>1</sup>H NMR of P5-CHO

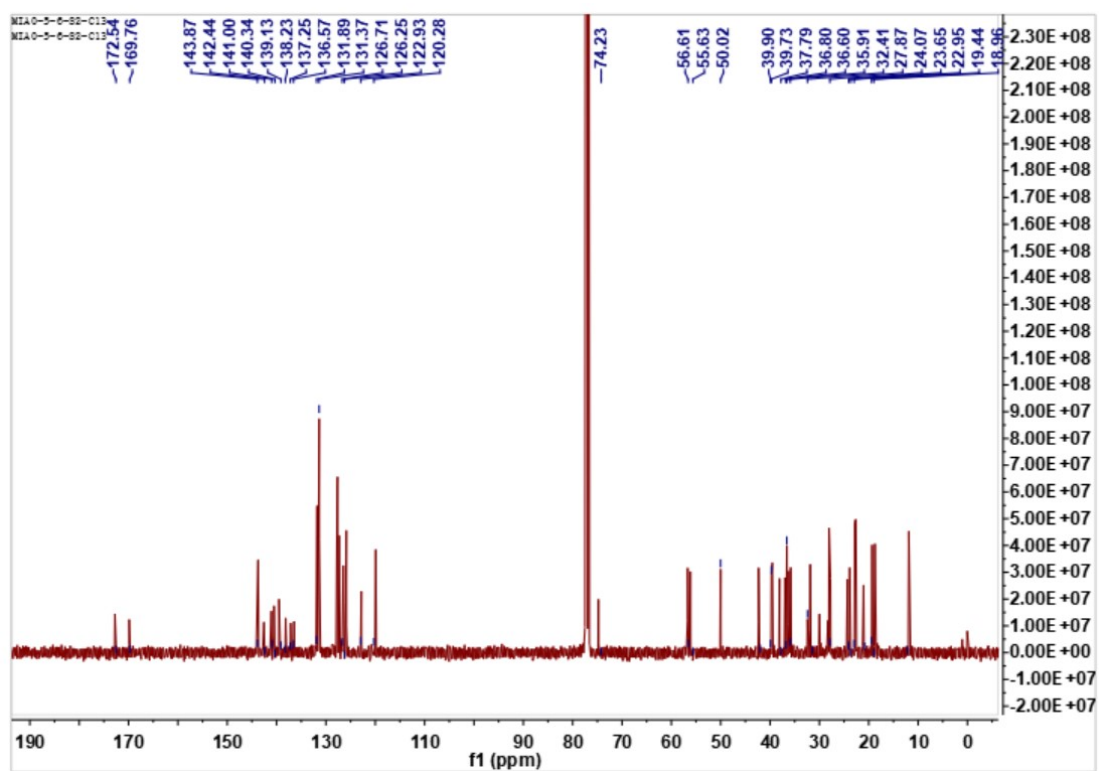

<sup>13</sup>C NMR of P5-CHO

Single Mass Analysis

Tolerance = 50.0 PPM / DBE: min = -1.5, max = 100.0

Element prediction: Off

Number of isotope peaks used for i-FIT = 3

Monoisotopic Mass, Even Electron Ions

69 formula(e) evaluated with 4 results within limits (up to 1 closest results for each mass)

Elements Used:

C: 0-70 H: 0-80 N: 0-4 O: 2-3

X-MA

ECUST institute of Fine Chem

21-Apr-2016

23:20:06

1: TOF MS ES+

9.49e+003

MX-WJ-04 54 (0.422) Cm (35:55)

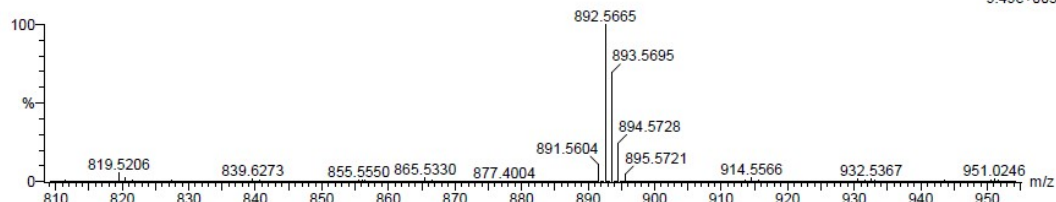

Minimum: -1.5  
Maximum: 300.0 50.0 100.0

| Mass     | Calc. Mass | mDa  | PPM  | DBE  | i-FIT | i-FIT (Norm) | Formula      |
|----------|------------|------|------|------|-------|--------------|--------------|
| 892.5665 | 892.5669   | -0.4 | -0.4 | 27.5 | 147.9 | 0.0          | C63 H74 N O3 |

HR-MS of P5-CHO



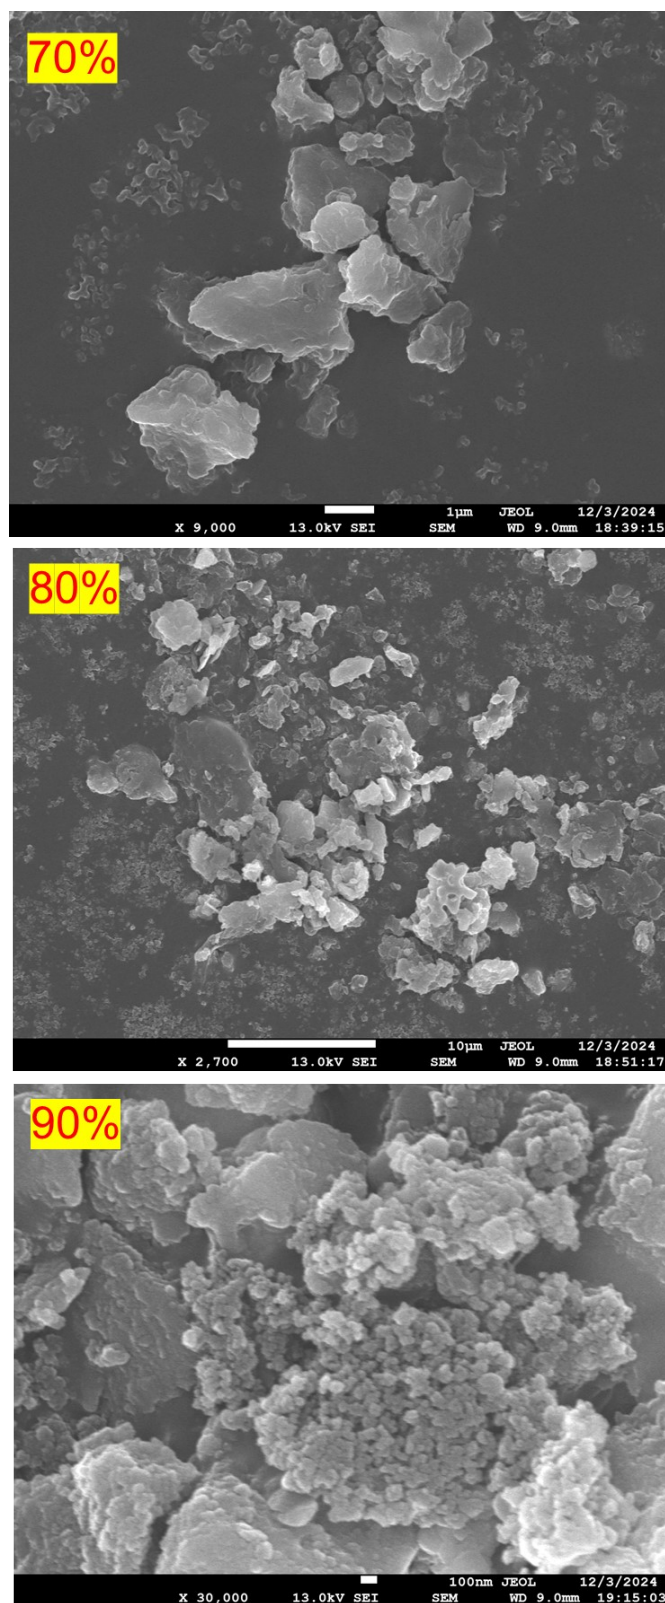

**Figure S1** SEM images of **P5-CHO** prepared from different water fractions in THF/water mixtures.

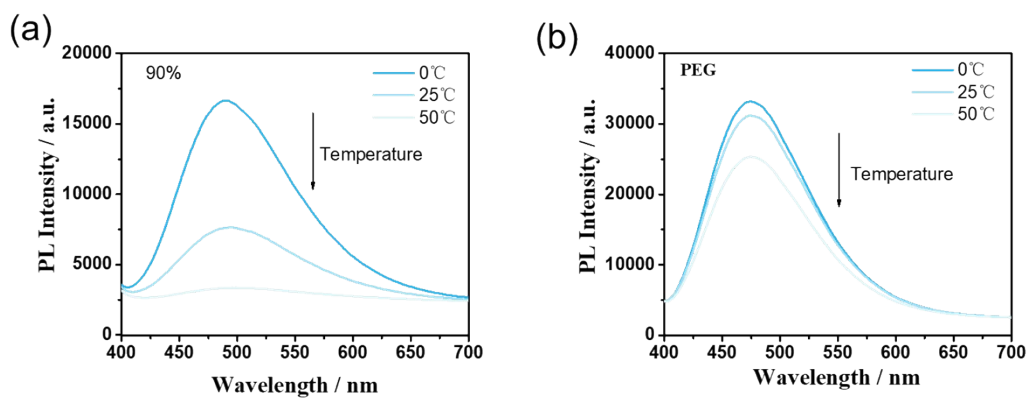

**Figure S2** PL spectra of **P5-CHO** in  $f_{\text{water}} = 90\%$  (v/v, THF/water mixture) and polyethylene glycol (PEG) with different temperature ( $\lambda_{\text{ex}} = 365$  nm), the concentration of **P5-CHO** is  $2.5 \times 10^{-5}$  mol/L, the concentration of PEG is 0.1g/mL.

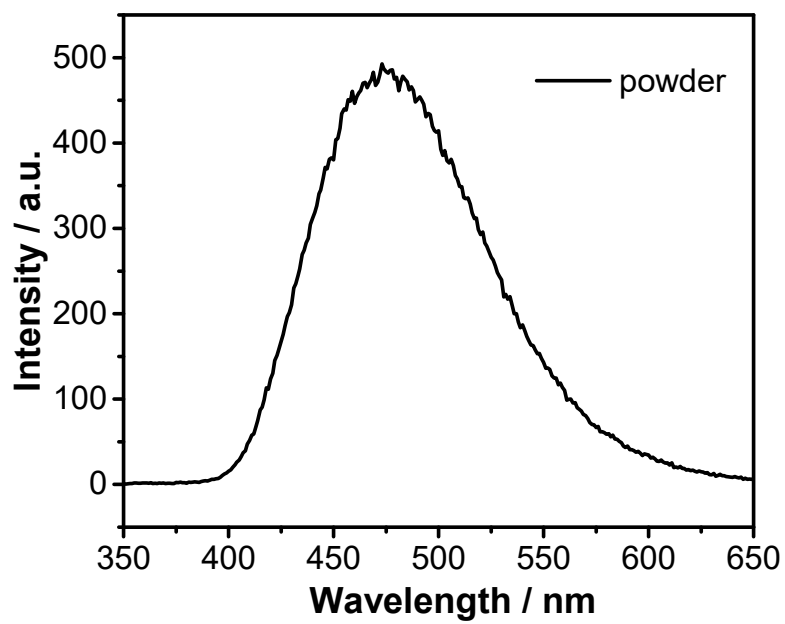

**Figure S3** PL spectra of **P5-CHO** in solid powder.

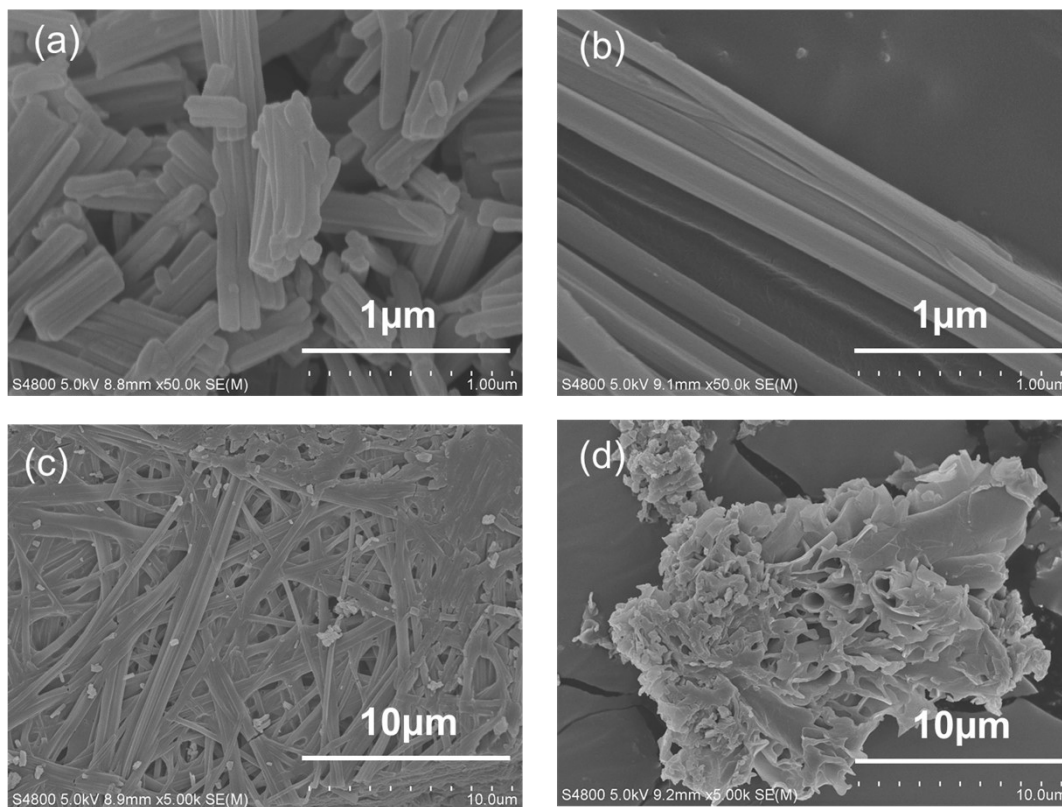

**Figure S4** SEM image of xerogel prepared from different solutions for **P5-CHO**, (a) cyclohexane, (b) acetone, (c) DMF, (d) DMSO.

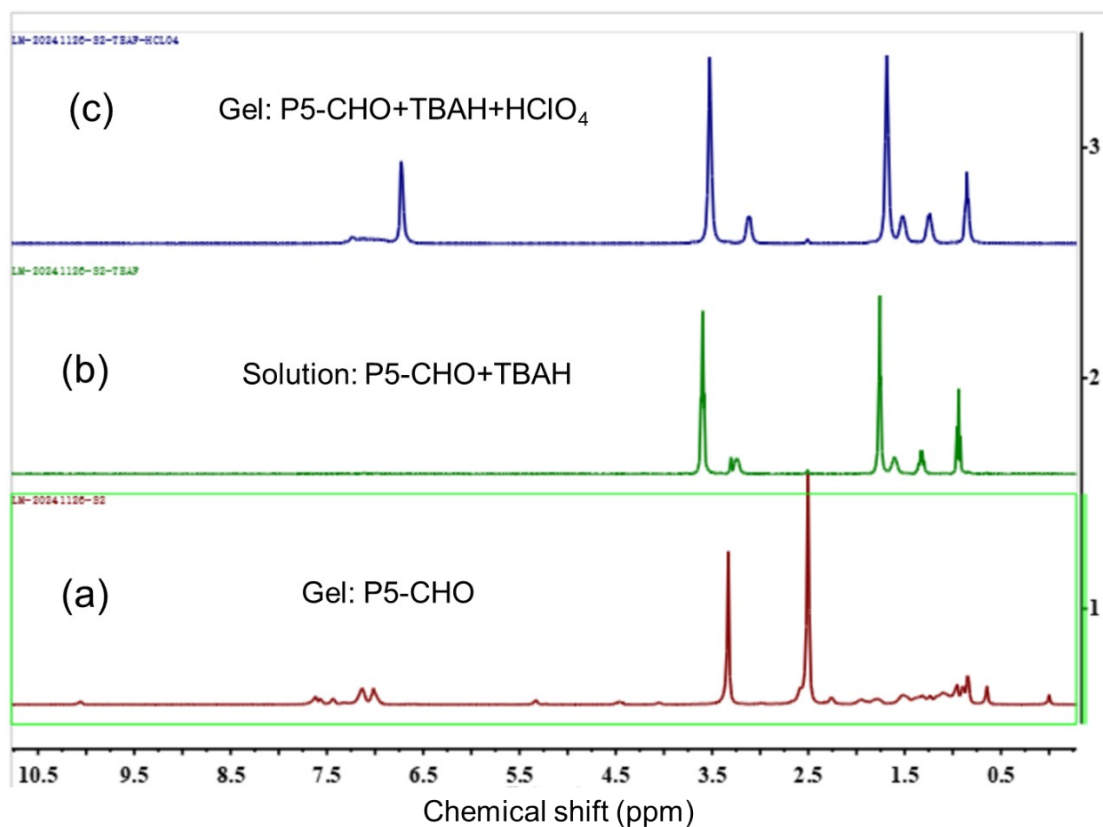

**Figure S5** <sup>1</sup>H NMR of **P5-CHO** in different conditions, solvent: DMSO-d<sub>6</sub>, (a) gel of P5-CHO: add 0.55mL deuterated DMSO to 10 mg **P5-CHO**, heat to dissolve, and then stand to obtain gel, (b) add 3 drops of 1mol/L tetrabutylammonium fluoride solution to (a) to obtain solution, (c) then add 2 drops of HClO<sub>4</sub> to solution(b) to form gel.

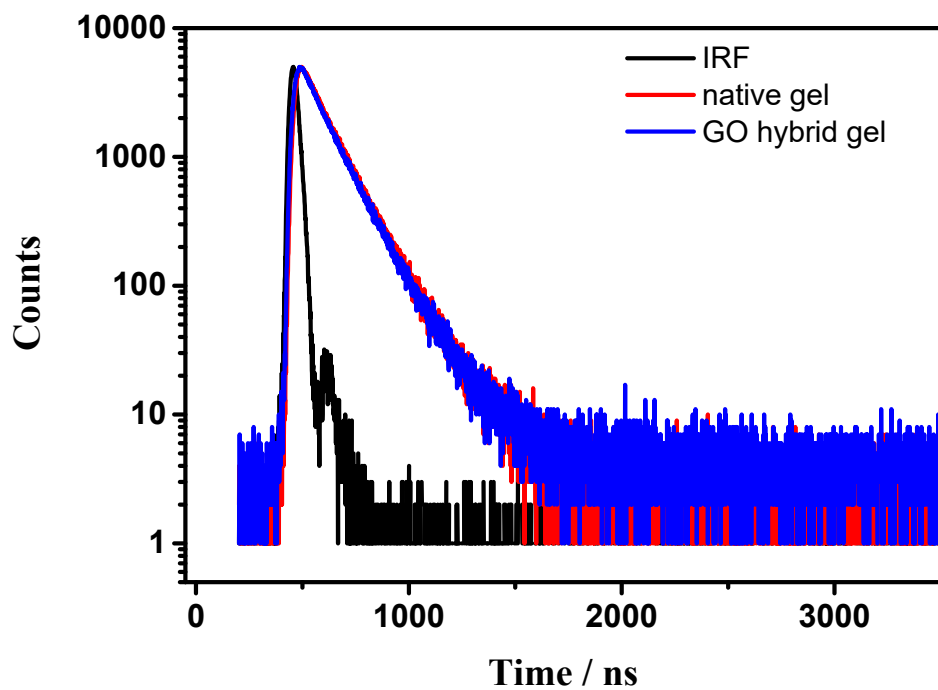

**Figure S6** Time-resolved emission decay curves of native gel and GO-hybrid gel of P5-CHO.

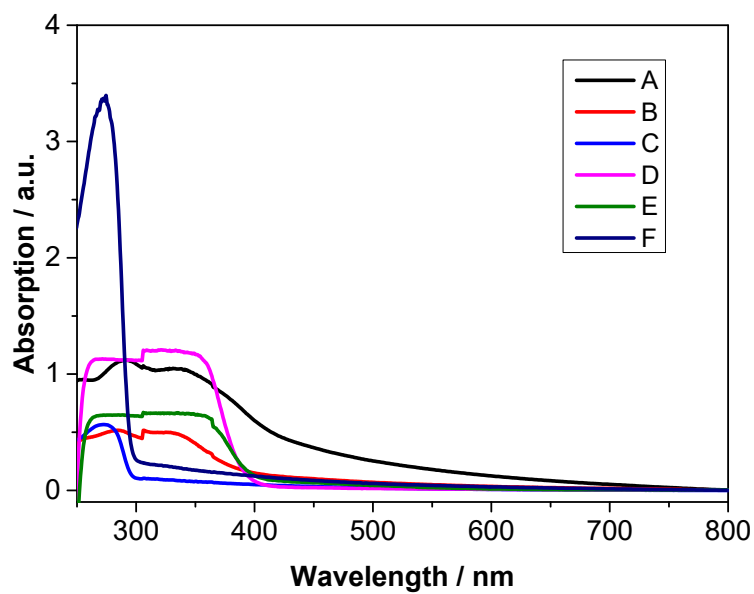

**Figure S7** UV-vis absorption spectra of hybrid gel system in different states, (A) gel in DMSO, (B) GO-hybrid gel in DMSO, (C) GO dissolved in DMSO, (D) gel in DMF, (E) GO-hybrid gel in DMF, (F) GO dissolved in DMF.

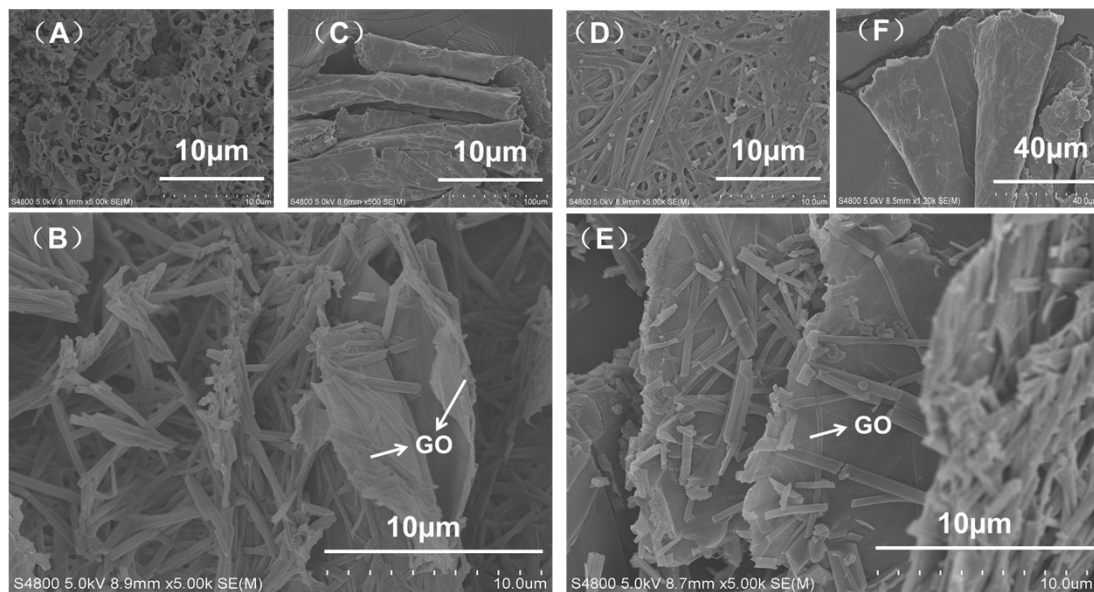

**Figure S8** SEM image of xerogel prepared from different solutions for **P5-CHO**, (A) gel in DMSO, (B) GO-hybrid gel in DMSO, (C) GO dissolved in DMSO, (D) gel in DMF, (E) GO-hybrid gel in DMF, (F) GO dissolved in DMF.



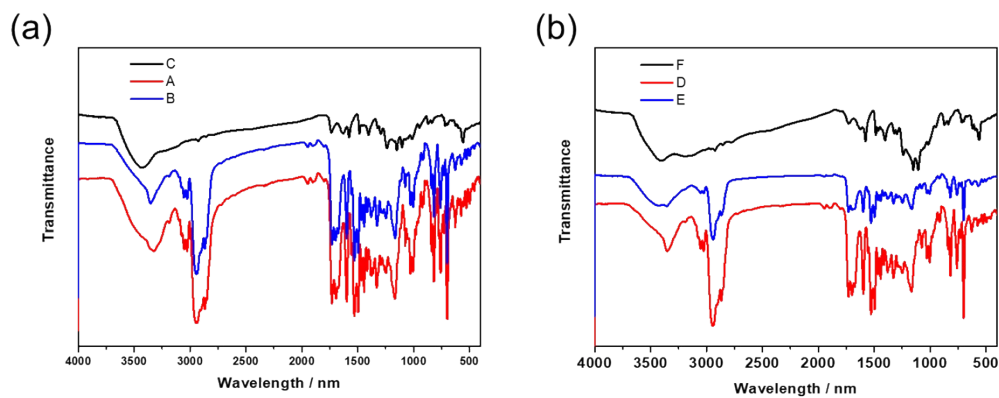

**Figure S9** FTIR spectrum of xerogel prepared from different solutions for **P5-CHO**, (A) gel in DMSO, (B) GO-hybrid gel in DMSO, (C) GO dissolved in DMSO, (D) gel in DMF, (E) GO-hybrid gel in DMF, (F) GO dissolved in DMF.

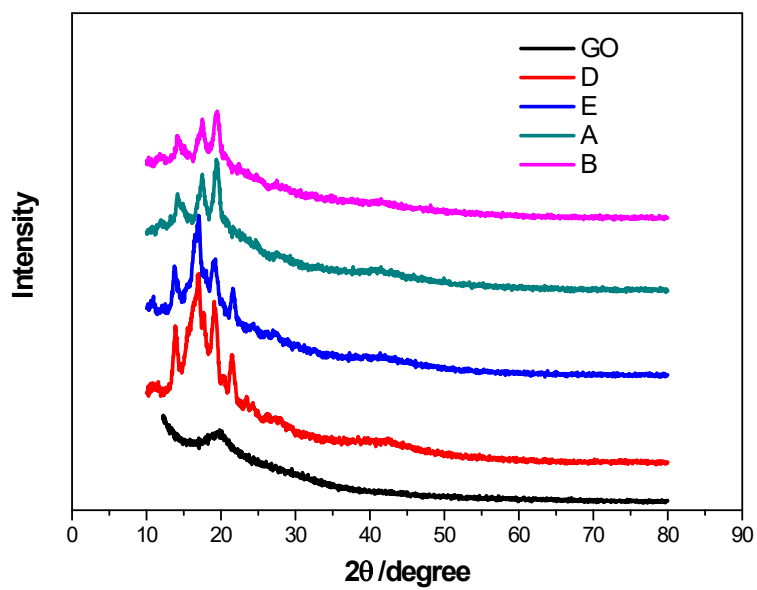

**Figure S10** XRD spectrum of xerogel prepared from different solutions for **P5-CHO**, (A) gel in DMSO, (B) GO-hybrid gel in DMSO, (D) gel in DMF, (E) GO-hybrid gel in DMF.

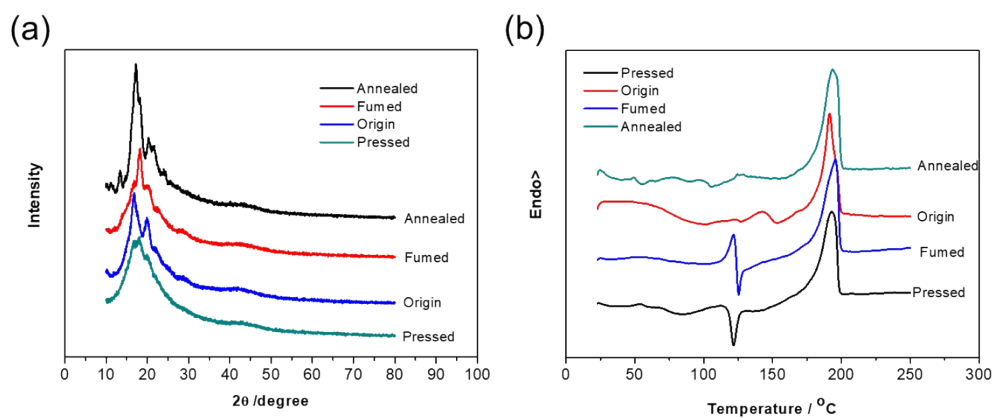

**Figure S11** WAXD curves (A) and normalized PL curves (B) of compound **P5-CHO** under the different conditions: origin, fumed (vapor the pressed sample in  $\text{CH}_2\text{Cl}_2$  for 5 min), pressing and annealing (heating the pressed sample at 164 °C for 5 min).

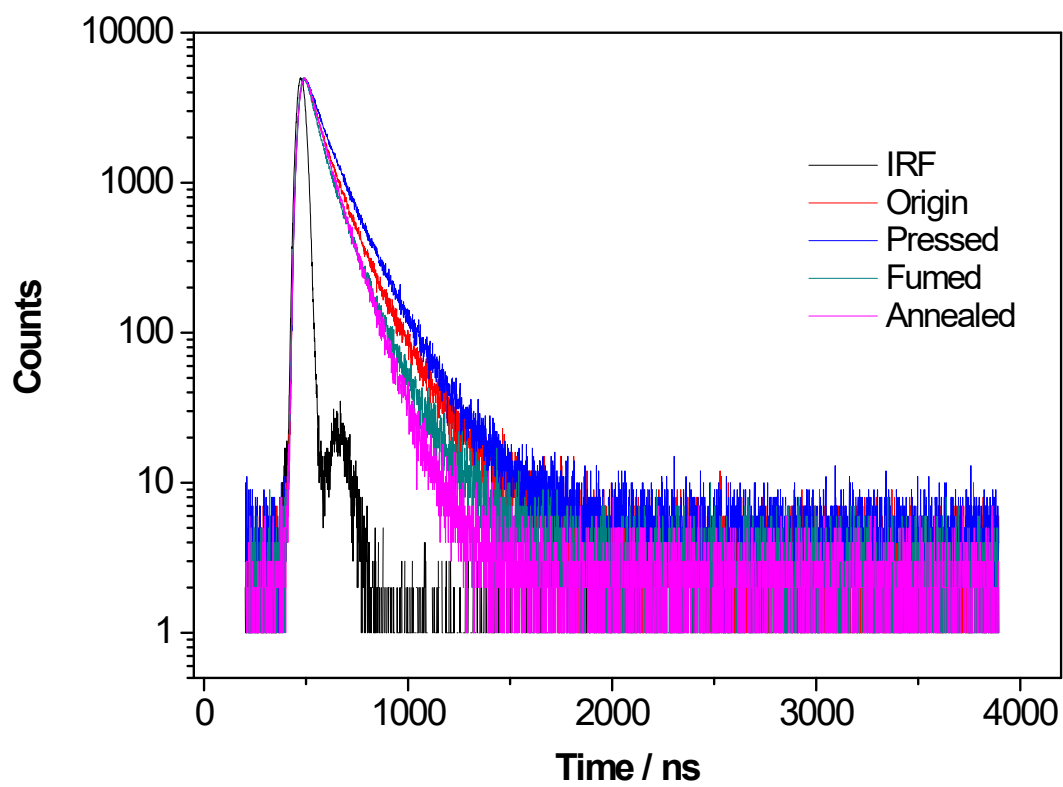

**Figure S12** Time-resolved emission decay curves of compound **P5-CHO** under different treatment conditions.

**Table S1** the relation of the CGC and the GO concentration in DMF and DMSO.

| in DMF     |             | in DMSO    |             |
|------------|-------------|------------|-------------|
| GO (mg/mL) | CGC (mg/mL) | GO (mg/mL) | CGC (mg/mL) |
| 2.0        | 101.1       | 2.0        | 101.2       |
| 4.0        | 51.5        | 4.0        | 68.3        |
| 6.0        | 34.0        | 6.0        | 51.0        |

**Table S2** Solid-state fluorescence lifetime data of **P5-CHO** under different conditions.

| Sample   | $\lambda_{em}(nm)$ | $\tau$ (ns) |
|----------|--------------------|-------------|
| Origin   | 473                | 3.23        |
| Pressed  | 495                | 3.72        |
| Fumed    | 473                | 2.73        |
| Annealed | 473                | 2.64        |

**Table S3** the photoluminescence quantum yield (PLQY) data of **P5-CHO** under different conditions.

| Sample  | PLQY(%) |
|---------|---------|
| Origin  | 32.23   |
| Pressed | 44.89   |

## References

1. M. Luo, X. Zhou, Z. Chi, S. Liu, Y. Zhang and J. Xu, *Dyes Pigments*, 2014, **101**, 74-84.
2. M. Luo, Y. Liu, J. Zhao, L. Jiang, X. Chen, W. Li, Z. Yang, Q. Yan, S. Wang and Z. Chi, *Dyes Pigments*, 2022, **202**, 110222.
